# Supplementary material
Source: ML conference proceedings conference paper supplement (https://proceedings.neurips.cc/paper_files/paper/2009/hash/0d0871f0806eae32d30983b62252da50-Abstract.html)
Supplement: Supplementary file 1 [file 0d0871f0806eae32d30983b62252da50-Supplemental.zip]

Archive with 1 entries (1 files):
- extra/NIPS2009_0929_extra.pdf
