# Supplementary material
Source: ML conference proceedings conference paper supplement (https://proceedings.neurips.cc/paper_files/paper/2009/hash/0d0871f0806eae32d30983b62252da50-Abstract.html)
Supplement: Supplementary file 1 [file 0d0871f0806eae32d30983b62252da50-Supplemental.zip › extra/NIPS2009_0929_extra.pdf]

---

# Supplementary Materials for “Rethinking LDA: Why Priors Matter”

---

Hanna M. Wallach   David Mimno   Andrew McCallum  
 Department of Computer Science  
 University of Massachusetts Amherst  
 Amherst, MA 01003  
 {wallach, mimno, mccallum}@cs.umass.edu

## 1 Conditional Posterior Probabilities for LDA

With symmetric Dirichlet priors over  $\Theta = \{\theta_1, \dots, \theta_D\}$  and  $\Phi = \{\phi_1, \dots, \phi_T\}$ , the conditional posterior probability, or predictive probability, of topic  $t$  occurring in document  $d$  given the corresponding topic assignments  $\mathcal{Z} = \{z^{(d)}\}_{d=1}^D$  for a corpus of documents  $\mathcal{W} = \{w^{(d)}\}_{d=1}^D$  is as follows:

$$P(z_{N_d+1}^{(d)} = t \mid \mathcal{Z}, \alpha \mathbf{u}) = \int d\theta_d P(t \mid \theta_d) P(\theta_d \mid \mathcal{Z}, \alpha \mathbf{u}) = \frac{N_{t|d} + \frac{\alpha}{T}}{N_d + \alpha}, \quad (1)$$

where topic  $t$  occurs  $N_{t|d}$  times in  $z^{(d)}$  of length  $N_d = \sum_t N_{t|d}$ . In other words, the conditional posterior distribution over topics for document  $d$  is a Pólya conditional distribution.

The conditional posterior distribution over words for topic  $t$  is also a Pólya conditional distribution.

## 2 Joint Distributions for LDA

With symmetric priors, the joint distribution over topic assignments  $\mathcal{Z}$  for documents  $\mathcal{W}$  is

$$\begin{aligned} P(\mathcal{Z} \mid \alpha \mathbf{u}) &= \prod_d \prod_n P(z_n^{(d)} \mid \mathcal{Z}_{<d,n}, \alpha \mathbf{u}) \\ &= \prod_d \prod_n \frac{N_{z_n^{(d)}|d}^{<d,n} + \frac{\alpha}{T}}{N_d^{<d,n} + \alpha} = \prod_d \frac{\Gamma(\alpha)}{\Gamma(N_d + \alpha)} \prod_t \frac{\Gamma(N_{t|d} + \frac{\alpha}{T})}{\Gamma(\frac{\alpha}{T})}, \end{aligned} \quad (2)$$

where “ $< d, n$ ” denotes a quantity involving data from documents  $1, \dots, d$  and, for document  $d$ , positions  $1, \dots, n-1$  only. In other words, the joint distribution over  $\mathcal{Z}$  is a Pólya distribution.

The joint distribution over  $\mathcal{W}$  given  $\mathcal{Z}$  is also a Pólya distribution.

## 3 Variation of Information for Topic Models

The similarity between two sets of topic assignments  $\mathcal{Z}$  and  $\mathcal{Z}'$  for documents  $\mathcal{W}$  can be measured using *variation of information*, introduced by Meilă [2] and recently used by Goldwater and Griffiths in the context of text processing [1]. Given two sets of topic assignments  $\mathcal{Z}$  and  $\mathcal{Z}'$  for some  $\mathcal{W}$  (with  $T$  and  $T'$  topics, respectively), computing the variation of information between  $\mathcal{Z}$  and  $\mathcal{Z}'$ , denoted  $\text{VI}(\mathcal{Z}, \mathcal{Z}')$ , requires three distributions:  $P(z)$  over the  $T$  topics in  $\mathcal{Z}$ , proportional to  $\{N_t\}_{t=1}^T$  for  $\mathcal{Z}$ ;  $P(z')$  over the  $T'$  topics in  $\mathcal{Z}'$ , proportional to  $\{N_{t'}\}_{t'=1}^{T'}$  for  $\mathcal{Z}'$ ; and  $P(z, z')$ , proportional to the number of tokens assigned to topic  $t$  in  $\mathcal{Z}$  and topic  $t'$  in  $\mathcal{Z}'$ .  $\text{VI}(\mathcal{Z}, \mathcal{Z}')$  is then

$$\begin{aligned} \text{VI}(\mathcal{Z}, \mathcal{Z}') &= H(z) + H(z') - 2I(z, z') \\ &= H(z \mid z') + H(z' \mid z), \end{aligned} \quad (3)$$

where  $H(\cdot)$  denotes the entropy of a random variable and  $I(\cdot, \cdot)$  denotes the mutual information between two random variables. If two sets of topic assignments  $\mathcal{Z}$  and  $\mathcal{Z}'$  are identical, then  $VI(\mathcal{Z}, \mathcal{Z}')$  will be zero. The higher the value of  $VI(\mathcal{Z}, \mathcal{Z}')$ , the greater the dissimilarity between  $\mathcal{Z}$  and  $\mathcal{Z}'$ .

## 4 Acknowledgments

This work was supported in part by the Center for Intelligent Information Retrieval, in part by CIA, NSA and NSF under NSF grant number IIS-0326249, and in part by subcontract number B582467 from Lawrence Livermore National Security, LLC under prime contract number DE-AC52-07NA27344 from DOE/NNSA. Any opinions, findings and conclusions or recommendations expressed in this material are the authors' and do not necessarily reflect those of the sponsor.

## References

- [1] S. Goldwater and T. L. Griffiths. A fully Bayesian approach to unsupervised part-of-speech tagging. In *Association for Computational Linguistics*, 2007.
- [2] M. Meilă. Comparing clusterings by the variation of information. In *Conference on Learning Theory*, 2003.
